# Supplementary material
Source: PubMed Central journal article supplement (PMC2781404)

# Suppl. Figure 1

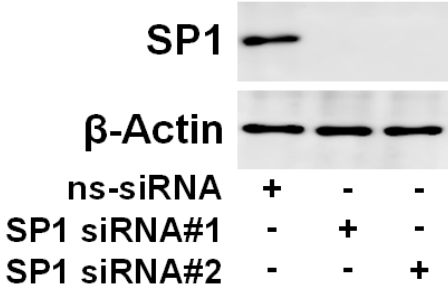

Supplement: supp_M109.031120_jbc.M109.031120-1.pdf [file supp_M109.031120_jbc.M109.031120-1.pdf]
